# Supplementary material
Source: PubMed Central journal article supplement (PMC4074250)

Online Supplementary Table 1. Risk of HIV seroconversion associated with penile HPV infection stratified by circumcision status

|                                          | Uncircumcised men      |                        |                      | Circumcised men        |                        |                      | Overall                |                        |                      |
|------------------------------------------|------------------------|------------------------|----------------------|------------------------|------------------------|----------------------|------------------------|------------------------|----------------------|
|                                          | No. HIV-seroconverters | Unadjusted HR (95% CI) | Adjusted HR (95% CI) | No. HIV-seroconverters | Unadjusted HR (95% CI) | Adjusted HR (95% CI) | No. HIV-seroconverters | Unadjusted HR (95% CI) | Adjusted HR (95% CI) |
| <b>HPV infection</b>                     |                        |                        |                      |                        |                        |                      |                        |                        |                      |
| No HPV                                   | 15                     | 1                      | 1                    | 8                      | 1                      | 1                    | 23                     | 1                      | 1                    |
| Any-HPV                                  | 27                     | 1.99 (1.06-3.77)       | 1.73 (0.80-3.78)     | 9                      | 2.68 (1.03-7.01)       | 1.69 (0.51-5.63)     | 36                     | 2.55 (1.51-4.32)       | 1.72 (0.94-3.15)     |
| No HPV                                   | 15                     | 1                      | 1                    | 8                      | 1                      | 1                    | 23                     | 1                      | 1                    |
| LR-HPV                                   | 7                      | 1.76 (0.71-4.33)       | 1.69 (0.57-5.01)     | 2                      | 1.68 (0.37-7.93)       | NA                   | 9                      | 2.04 (0.95-4.40)       | 1.25 (0.45-3.42)     |
| HR-HPV                                   | 20                     | 2.14 (1.08-4.23)       | 1.73 (0.75-4.03)     | 7                      | 2.90 (1.07-7.84)       | 2.66 (0.79-8.90)     | 27                     | 2.74(1.657-4.79)       | 1.92 (0.96-3.87)     |
| <b>Number of HPV infections</b>          |                        |                        |                      |                        |                        |                      |                        |                        |                      |
| 0 types                                  | 15                     | 1                      | 1                    | 8                      | 1                      | 1                    | 23                     | 1                      | 1                    |
| 1-2 types                                | 15                     | 1.37 (0.65-2.94)       | 1.42 (0.56-3.55)     | 7                      | 1.89 (0.60-6.01)       | 1.04 (0.22-5.28)     | 22                     | 1.70 (0.90-3.23)       | 1.41 (0.64-3.13)     |
| >=3 types                                | 12                     | 3.23 (1.49-7.01)       | 2.54 (0.93-6.91)     | 2                      | 6.94 (2.01-24.02)      | 6.17 (1.41-26.53)    | 14                     | 4.92 (2.55-9.47)       | 3.45 (1.49-7.96)     |
| Risk per infection                       | 42                     | 1.24 (1.10-1.38)       | 1.16 (0.94-1.38)     | 17                     | 1.44 (1.18-1.78)       | 1.55 (1.17-1.96)     | 59                     | 1.33 (1.22-1.48)       | 1.27 (1.09-1.48)     |
| <b>Clearance/Persistence<sup>a</sup></b> |                        |                        |                      |                        |                        |                      |                        |                        |                      |
| Uninfected                               | 15                     | 1                      | 1                    | 5                      | 1                      | 1                    | 20                     | 1                      | 1                    |
| Clearance, only                          | 11                     | 1.89 (0.78-4.63)       | 1.31 (0.46-3.76)     | 8                      | 2.54 (0.75-8.59)       | 3.59 (0.71-18.38)    | 19                     | 2.14 (1.04-4.37)       | 2.95 (1.14-7.55)     |
| Persistence, only                        | 3                      | 3.49 (0.93-13.25)      | 3.86 (1.00-14.67)    | 1                      | 6.73 (0.71-60.79)      | 8.52 (0.73-98.24)    | 4                      | 5.12 (1.65-15.78)      | 7.43 (2.18-25.36)    |
| Clearance+Persistence                    | 8                      | 4.35(1.64-11.42)       | 3.01 (0.94-9.60)     | 3                      | 7.12 (1.56-31.91)      | 4.02 (0.35-45.67)    | 11                     | 5.74 (2.57-12.84)      | 3.73 (1.29-10.55)    |

Online Supplementary Figure 1. Kaplan-Meier curve displaying the cumulative risk of HIV seroconversion among men with no HPV infection, recently cleared infections, and persistent infections

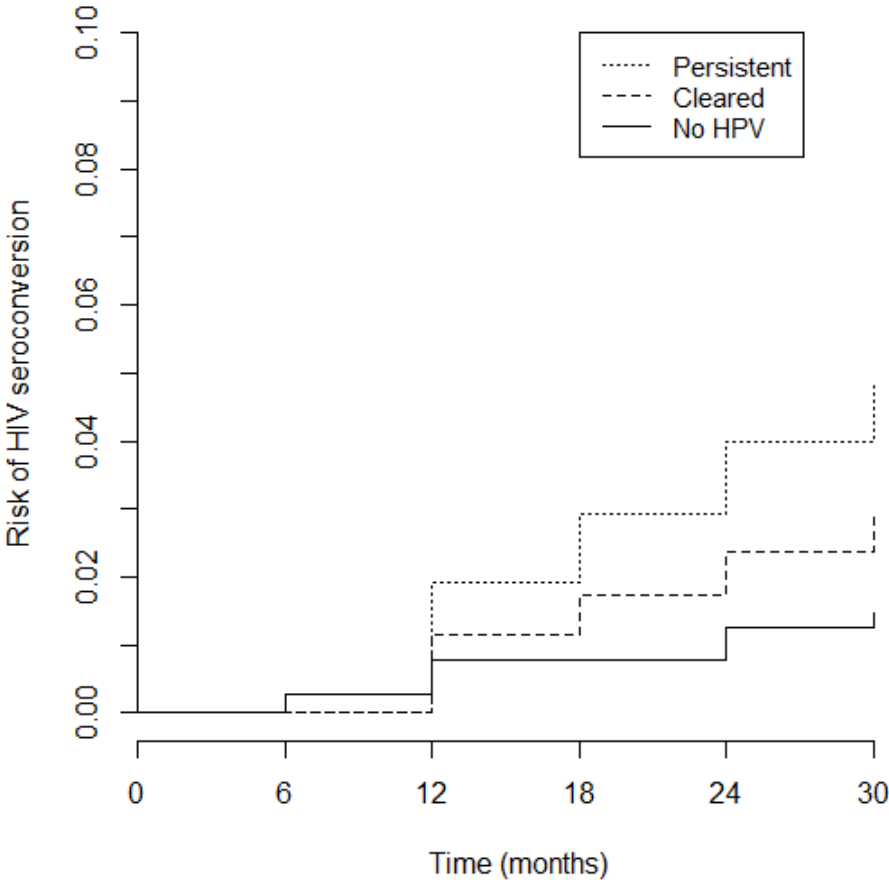

Supplement: NIHMS588798-supplement-1.pdf [file NIHMS588798-supplement-1.pdf]
